# Supplementary material for: Characteristics and liming potential of biochar types from potato waste and pine-bark
Source: PLoS One. 2023 Feb 21;18(2):e0282011. doi: 10.1371/journal.pone.0282011 (PMC9943015; doi:10.1371/journal.pone.0282011)
Supplement: S1 Data — (XLSX) [file pone.0282011.s001.xlsx]

## Sheet: Characterisation results
Treatments	pyrolysis temp	Replicate	pH(KCl)	pH(Water)	K Cmolc kg-1	Ca Cmolc kg-1	Mg Cmolc kg-1	Na Cmolc kg-1	CEC Cmolc kg-1	% FC	% ASH	% VM	% MOISTURE CONTENT	% C	% N	C/N	% H	% O	H/C	O/C	Yield	P (mg/kg)	CCE (%)
PB	0	1	3.11	4.07	1.0483	1.37855	2.79642	-0.124902	14.014	29.7535	0.418134	69.8283	10.1621	51.019	0.23542	216.715	5.294	43.0334	0.103765	0.843479	100	11.8644
PB	0	2	3.1	3.94	1.02915	1.22244	1.881	-0.176141	10.8408	29.3277	0.4914	70.1809	10.6209	50.75	0.2619	193.776	5.011	43.4857	0.0987389	0.856861	100	13.5593	6.33903
PB	0	3	3.04	4	1.34642	1.12968	2.191	-0.191525	12.0147	29.4702	0.397351	70.1325	10.0119								100	16.9492	8.34083
PB	350	1	5.03	6.48	0.725352	0.790025	0.471333	-0.259539	3.35979	58.0697	0.912409	41.0178	2.51038	69.651	0.35156	198.12	3.746	25.339	0.0537824	0.3638	52.2143	0	8.34083
PB	350	2	4.36	6.66	1.02935	0.57207	0.255083	-0.265363	3.1384	58.2371	0.911854	40.8511	2.79693	70.98	0.341	208.152	3.815	23.9521	0.0537475	0.337449	52.125	0	6.33903
PB	350	3	4.95	6.8	1.02005	0.543142	0.295083	-0.267058	3.25438	57.7832	0.92873	41.2881	2.42317								52.133	0	9.34173
PB	650	1	9.1	9.09	2.07357	1.35062	0.1965	-0.199478	2.81097	92.0651	2.03459	5.90031	1.99402	90.485	0.36655	246.856	2.165	4.94886	0.0239266	0.0546926	33.0625	0	10.3426
PB	650	2	9.21	8.99	2.89334	1.94364	0.217167	-0.167319	2.87625	91.4547	2.44151	6.10376	1.84723	89.747	0.36828	243.692	2.217	5.22621	0.0247028	0.0582327	33.3333	0	9.34173
PB	650	3	9.12	9.23	2.69326	1.83192	0.15075	-0.162625	2.78361	92.2414	1.97769	5.78093	1.59681								32.5	0	8.34083
CP	0	1	7.71	8.15	24.046	1.4414	6.43483	-0.191656	57.7451	17.2529	4.45236	78.2947	11.6618	39.41	1.208	32.6242	6.235	48.6946	0.158209	1.23559	100	81.3559
CP	0	2	7.67	8.1	21.5787	0.917207	6.19558	-0.282529	57.7379	17.3749	4.53838	78.0868	11.7069	38.624	0.989	39.0536	6.385	49.4636	0.165312	1.28064	100	81.3559	6.33903
CP	0	3	7.68	8.11	22.4803	0.960599	6.49683	-0.286658	57.7369	17.2235	4.22122	78.5553	11.5768								100	83.0508	7.33993
CP	350	1	10.28	11.08	12.8498	1.60798	7.72117	-0.207823	57.7284	55.812	10.6966	33.4913	3.51959	66.205	2.174	30.4531	4.068	16.8564	0.0614455	0.254609	29.8125	696.61	10.3426
CP	350	2	10.23	11.11	17.2584	1.38354	7.38492	-0.178835	57.7205	56.1227	10.6812	33.1961	3.49553	66.021	2.201	29.9959	4.037	17.0598	0.0611472	0.258399	29.875	713.559	12.3444
CP	350	3	10.33	11.07	17.4991	1.42693	7.63033	-0.190265	57.7366	55.7113	10.8041	33.4845	3.52099								30.625	725.424
CP	650	1	11.78	12.18	15.0672	1.04539	2.70058	-0.0833985	57.728	70.0648	15.2705	14.6647	6.08201	71.636	1.457	49.1668	1.709	9.92748	0.0238567	0.138582	21.5	1057.63
CP	650	2	11.52	12.1	13.2332	1.10574	3.21975	-0.110083	57.7265	69.7762	15.8753	14.3485	5.99685	71.361	1.441	49.5219	1.778	9.54466	0.0249156	0.133752	22.0625	1108.47	17.3489
CP	650	3	11.49	12.13	12.7207	1.06085	2.93975	-0.114733	52.4555	70.39	15.2819	14.3281	6.16547								21.8125	1066.1	17.3489
PP	0	1	8.31	8.65	19.1958	1.77756	9.79175	0.523164	57.716	17.846	7.6324	74.5216	10.2994	38.956	1.494	26.075	6.19	45.7276	0.158897	1.17383	100	49.1525	7.33993
PP	0	2	8.3	8.58	19.6255	1.5591	9.68317	0.54246	57.7601	18.1217	7.71605	74.1623	10.0357	38.895	1.443	26.9543	5.984	45.962	0.15385	1.18169	100	42.3729	5.33813
PP	0	3	8.27	8.59	18.9061	1.64489	9.54258	0.553629		18.0461	7.53019	74.4237	10.1046								100	38.9831	7.33993
PP	350	1	10.1	10.66	12.3765	2.34214	6.84442	1.97219	9.94687	52.2794	19.0715	28.6491	4.41735	61.019	2.432	25.09	4.091	13.3865	0.0670447	0.219382	34.375	171.186	10.3426
PP	350	2	10.04	10.67	12.6179	2.38703	7.60833	2.21169	9.7391	50.28	19.2906	30.4294	4.0215	60.636	2.528	23.9858	3.566	13.9794	0.0588099	0.230546	33.4375	198.305	8.34083
PP	350	3	10.13	10.71	10.644	2.43142	7.60192	2.01269	10.9717	50.2905	19.1909	30.5187	4.0223									211.864	9.34173
PP	650	1	12.33	12.59	10.9538	3.17456	2.46442	2.99978		60.3852	26.1752	13.4396	3.57428	63.587	1.8	35.3261	1.744	6.69381	0.027427	0.10527	24.625	1179.66	19.3507
PP	650	2	12.34	12.62	10.6392	3.65786	3.48517	3.11425	31.255	60.7778	26.5205	12.7017	3.72436	64.102	1.877	34.1513	1.724	5.77652	0.0268946	0.0901145	24.1875	1105.08	20.3516
PP	650	3	12.37	12.62	8.66473	3.61895	3.77692	3.1488	30.3647	60.7608	26.2715	12.9676	5.9126								24.625	1155.93	19.3507

## Sheet: Ukulinga liming potential
Treatments	Replicates	pHKCl
Control	1	4.87
Control	2	4.77
Control	3	4.86
CaCO3 - 1	1	5.8
CaCO3 - 1	2	5.93
CaCO3 - 1	3	5.81
CP350 - 1	1	5.07
CP350 - 1	2	5.1
CP350 - 1	3	5.1
CP650 - 1	1	5.41
CP650 - 1	2	5.4
CP650 - 1	3	5.38
PB350 - 1	1	4.82
PB350 - 1	2	4.8
PB350 - 1	3	4.8
PB650 - 1	1	4.88
PB650 - 1	2	4.84
PB650 - 1	3	4.84

## Sheet: Bulwer liming potential
Treatments	Replicates	pHKCl
Control	1	4.31
Control	2	4.31
Control	3	4.31
CaCO3 - 1	1	6.45
CaCO3 - 1	2	6.7
CaCO3 - 1	3	6.74
CP350 - 1	1	5.56
CP350 - 1	2	5.52
CP350 - 1	3	5.57
CP650 - 1	1	5.84
CP650 - 1	2	5.75
CP650 - 1	3	5.83
PB350 - 1	1	4.51
PB350 - 1	2	4.54
PB350 - 1	3	4.52
PB650 - 1	1	4.54
PB650 - 1	2	4.58
PB650 - 1	3	4.59
